# Supplementary figures and images for: Variable expression of subclinical phenotypes instead of reduced penetrance in families with mild triphalangeal thumb phenotypes
Source: HighWire-hosted journal article supplement (doi:10.1136/jmedgenet-2019-106685), 2020-03-16

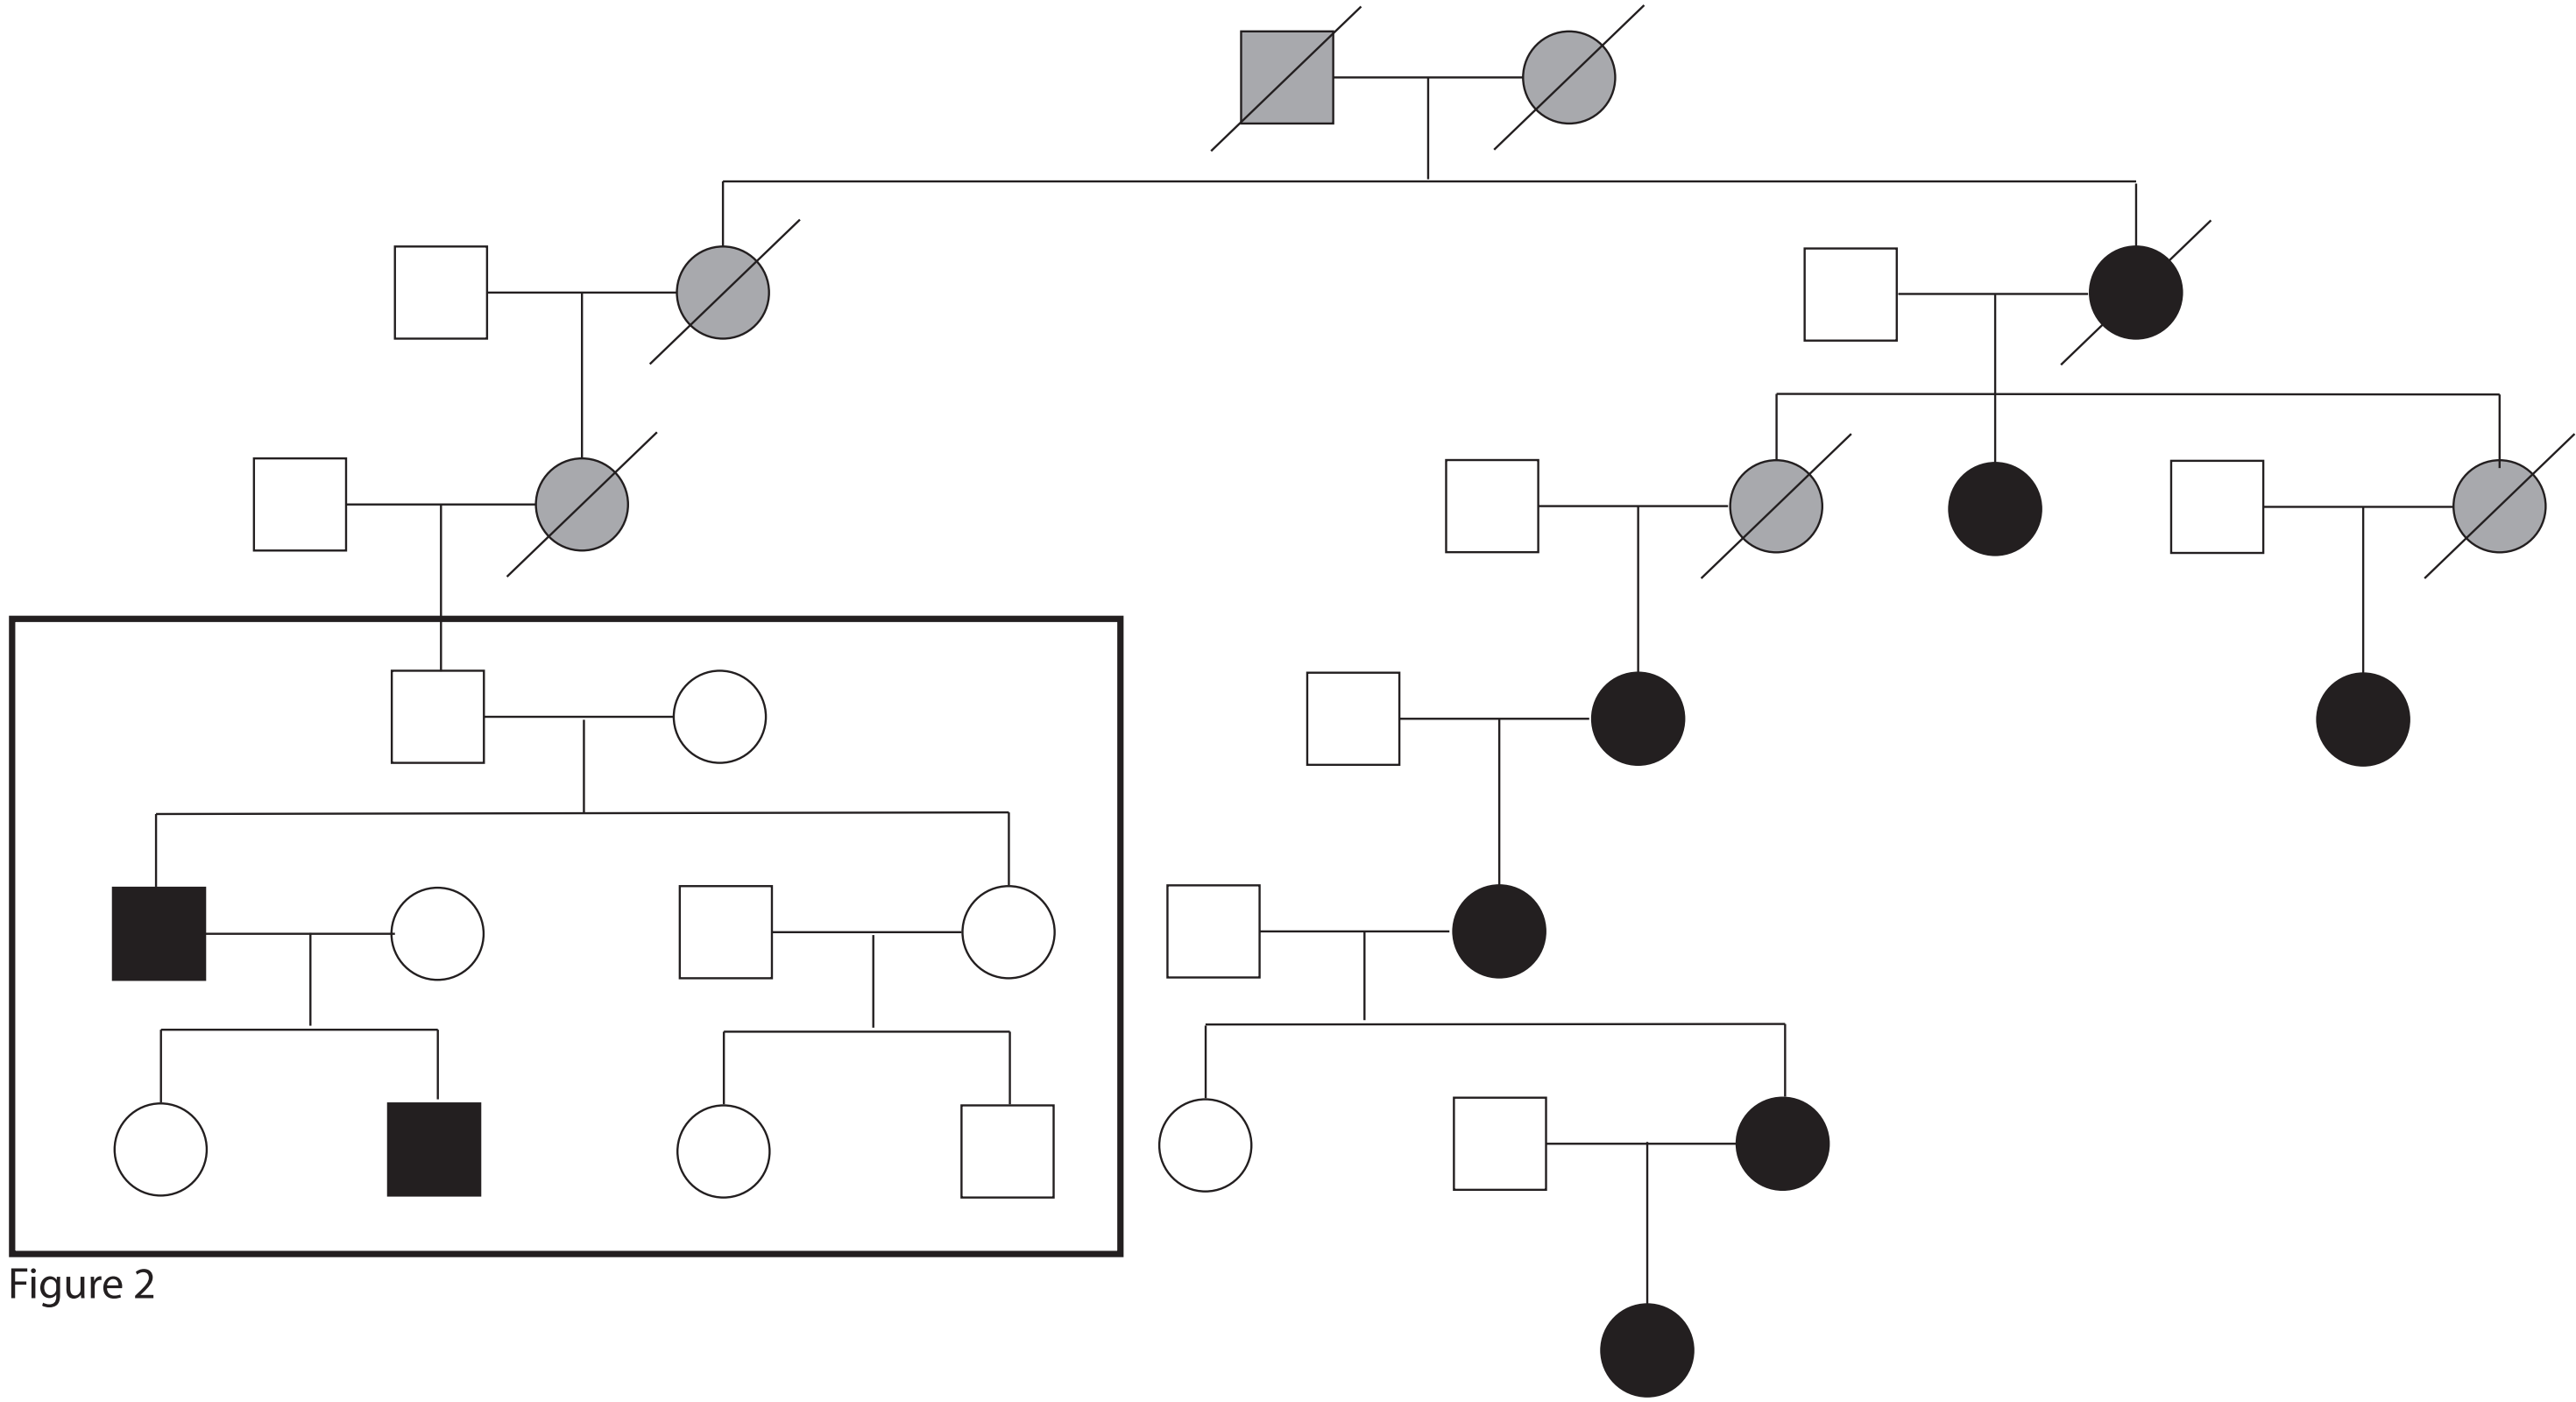

Figure 2

Supplement: jmedgenet-2019-106685supp001_data_supplement.pdf [file jmedgenet-2019-106685supp001_data_supplement.pdf]
